# Supplementary material for: Trends in Remote Retinal Imaging Utilization and Payments in the United States
Source: PubMed Central journal article supplement — Ophthalmology. Author manuscript; Available in PMC 2023 Mar 1. (PMC8958947; doi:10.1016/j.ophtha.2021.10.010), 2021-10-12
Supplement: NIHMS1788109-supplement-Supplemental_Figures_S2A__S2B__S2C__S2D__S2E__S2F__S2G.pdf [file NIHMS1788109-supplement-Supplemental_Figures_S2A__S2B__S2C__S2D__S2E__S2F__S2G.pdf]

**Figure S2. Insurance Claim Payments by Demographic Variables.**

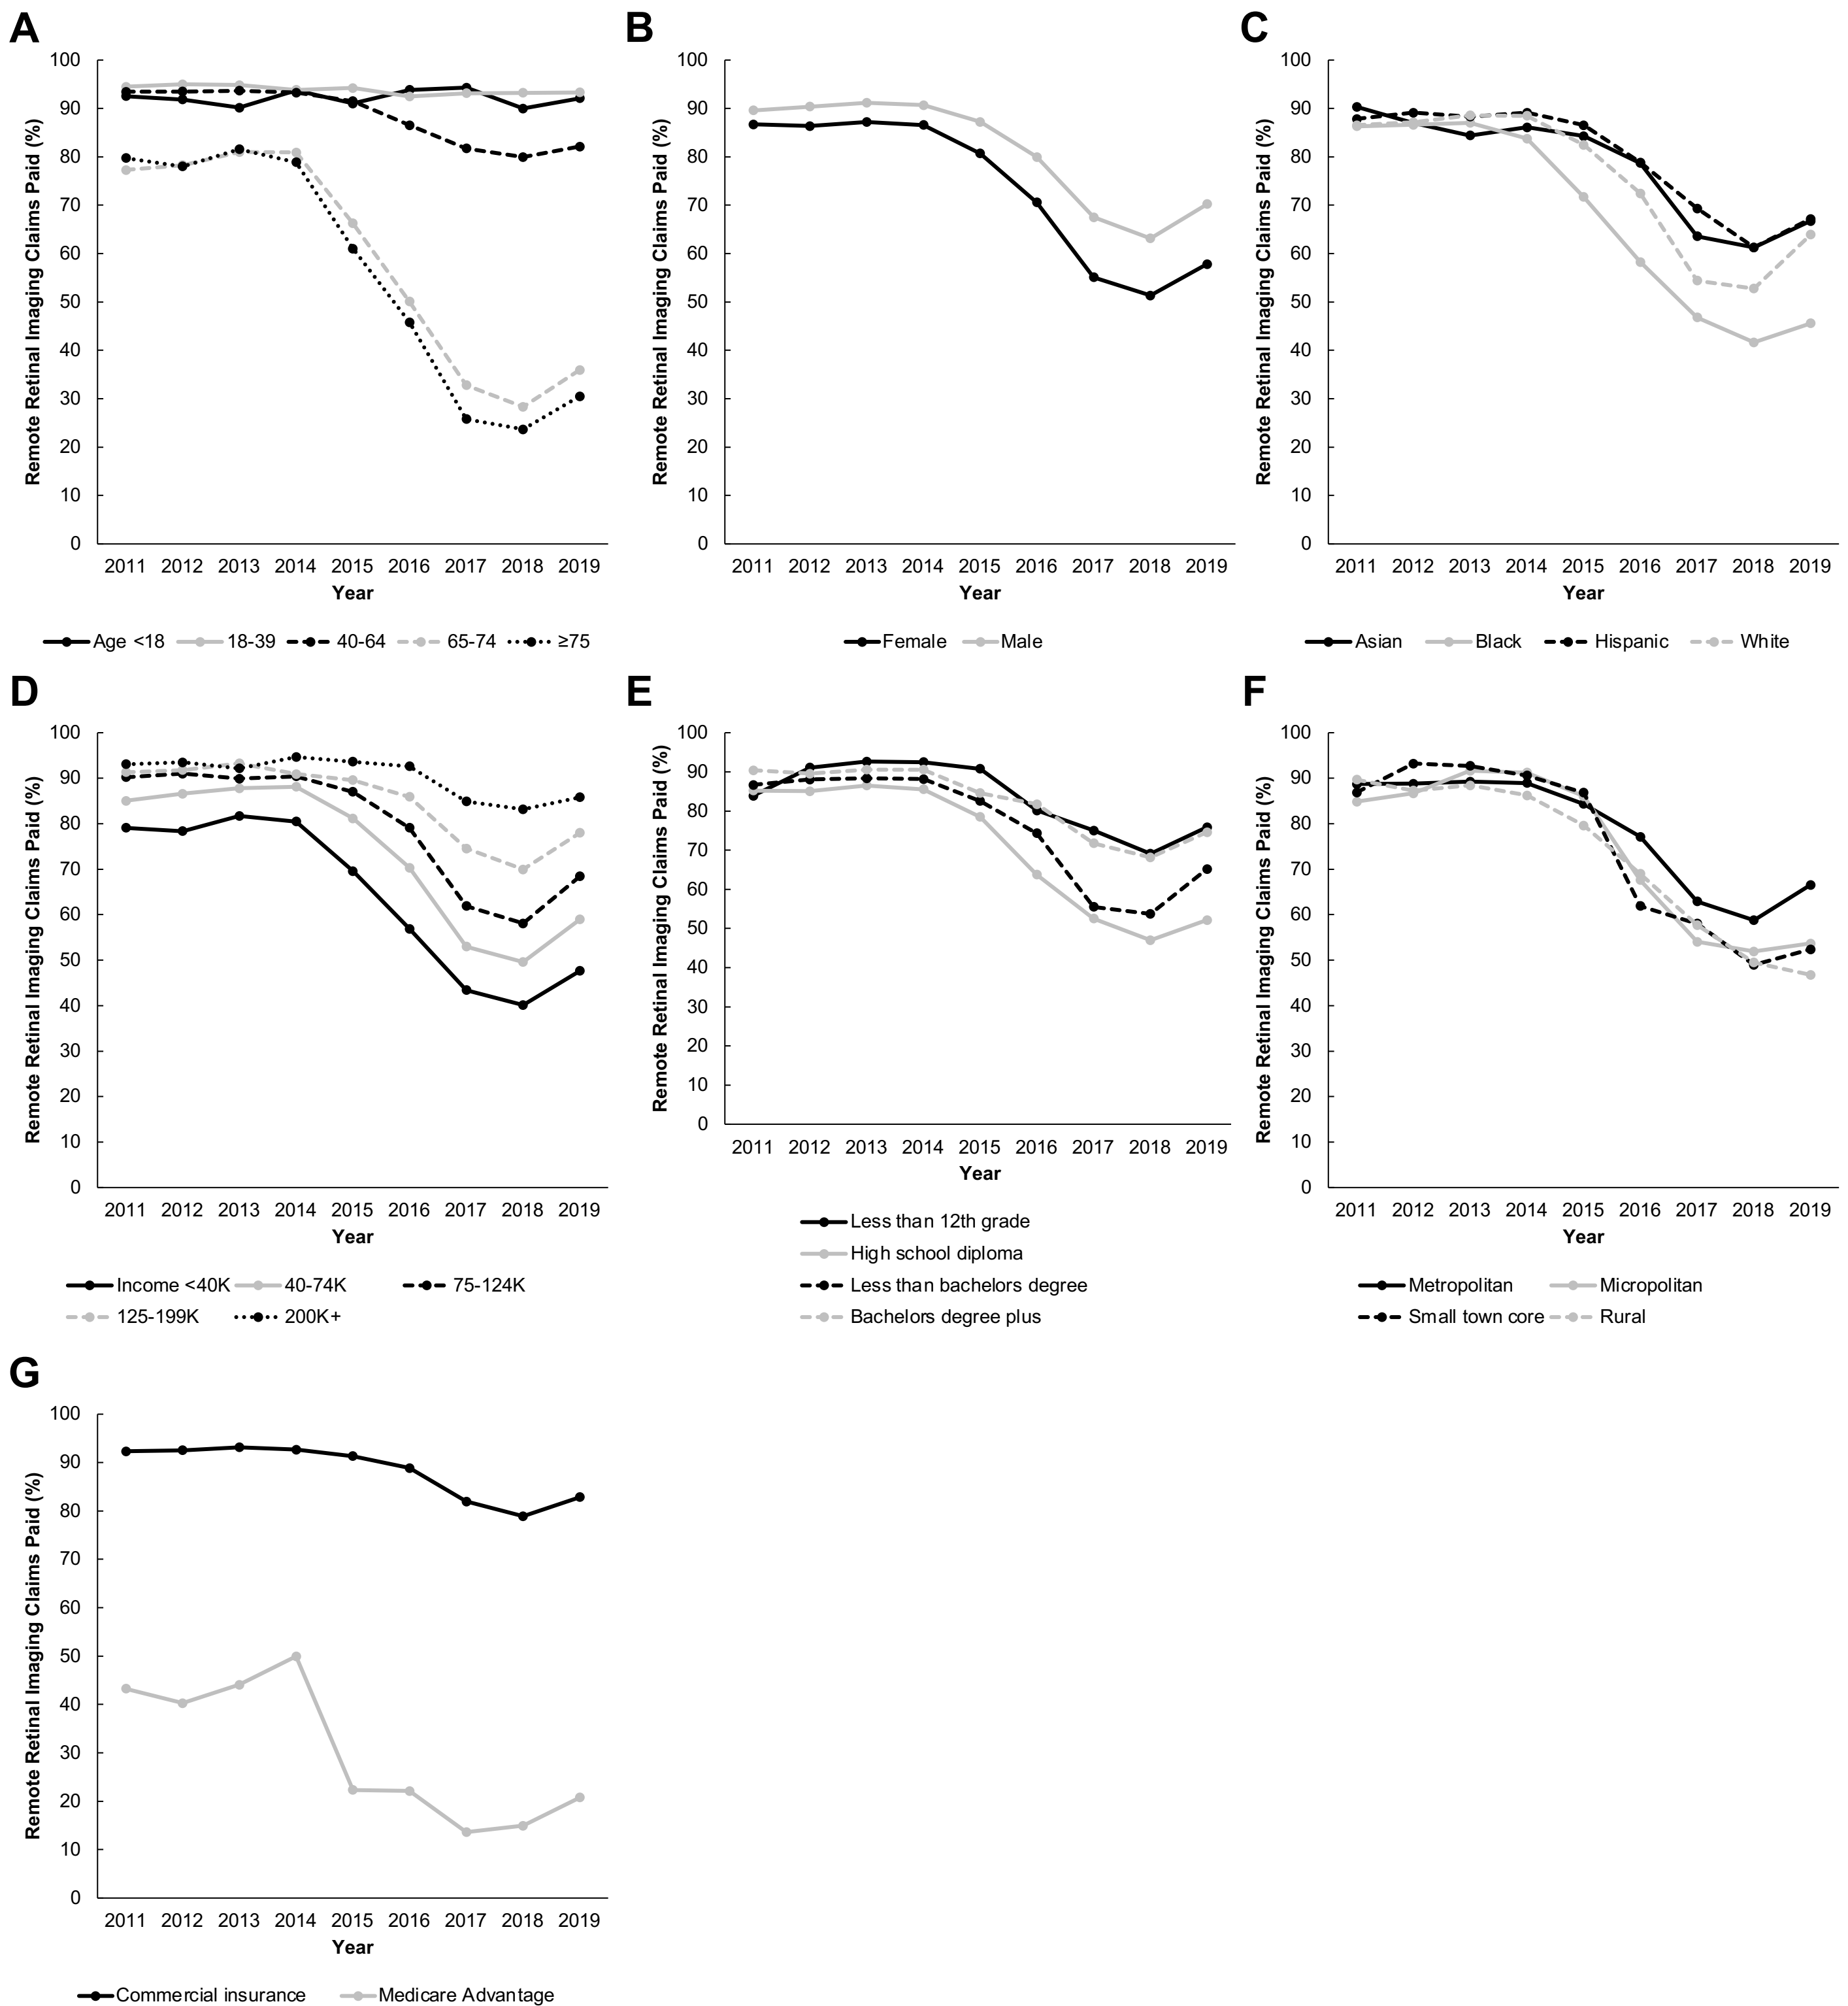

Line graphs of insurance payments for remote retinal imaging services using all CPT codes by (A) age, (B) sex, (C) race, (D) household income level, (E) education level, (F) Rural Urban Commuting Area (RUCA) code, and (G) insurance type per year.
