# Supplementary material for: Trends in Remote Retinal Imaging Utilization and Payments in the United States
Source: PubMed Central journal article supplement — Ophthalmology. Author manuscript; Available in PMC 2023 Mar 1. (PMC8958947; doi:10.1016/j.ophtha.2021.10.010), 2021-10-12
Supplement: NIHMS1788109-supplement-Supplemental_Table_1.pdf [file NIHMS1788109-supplement-Supplemental_Table_1.pdf]

**Supplemental Table 1. Multivariable Logistic Regression Analysis of Factors Associated with Insurance Payment**

|                                    | 92227<br>n = 16 124 |             |       | 92228<br>n = 3 256 |              |        | 92250<br>n = 169 140 |             |       |
|------------------------------------|---------------------|-------------|-------|--------------------|--------------|--------|----------------------|-------------|-------|
|                                    | OR                  | 95% CI      | P     | OR                 | 95% CI       | P      | OR                   | 95% CI      | P     |
| <b>Year</b>                        | 0.90                | (0.88–0.93) | <.001 | 1.16               | (1.10–1.21)  | <.001  | 0.84                 | (0.83–0.84) | <.001 |
| <b>Visit Diagnosis<sup>a</sup></b> |                     |             |       |                    |              |        |                      |             |       |
| DM without eye disease             | -                   | -           | -     | -                  | -            | -      | -                    | -           | -     |
| Diabetic eye disease               | 1.37                | (1.11–1.68) | 0.004 | 0.36               | (0.27–0.49)  | <.001  | 1.01                 | (0.94–1.07) | 0.811 |
| Other eye disease                  | 0.99                | (0.84–1.17) | 0.916 | 0.21               | (0.15–0.28)  | <.001  | 1.13                 | (1.08–1.17) | <.001 |
| Other                              | 1.03                | (0.81–1.30) | 0.822 | 0.13               | (0.08–0.22)  | <.001  | 1.12                 | (1.08–1.17) | <.001 |
| <b>Provider Type</b>               |                     |             |       |                    |              |        |                      |             |       |
| Eye care provider                  | 0.31                | (0.28–0.35) | <.001 | 1.40               | (1.03–1.90)  | 0.034  | 1.50                 | (0.85–2.63) | 0.159 |
| General provider                   | -                   | -           | -     | -                  | -            | -      | -                    | -           | -     |
| Non-eye specialist                 | 0.70                | (0.56–0.88) | 0.002 | 2.09               | (1.21–3.62)  | 0.008  | 0.92                 | (0.88–0.96) | <.001 |
| Other                              | 0.80                | (0.36–1.74) | 0.565 | 11.88              | (1.50–94.05) | 0.019  | 1.02                 | (0.94–1.10) | 0.684 |
| Unknown                            | 1.93                | (0.54–6.89) | 0.314 | NE                 | NE           | NE     | 0.82                 | (0.74–0.92) | <.001 |
| Facility                           | 4.55                | (3.62–5.72) | <.001 | 4.47               | (2.53–7.92)  | <.001  | 4.07                 | (3.82–4.35) | <.001 |
| <b>Provider Setting</b>            |                     |             |       |                    |              |        |                      |             |       |
| Group practice                     | 0.41                | (0.34–0.50) | <.001 | 1.07               | (0.65–1.76)  | 0.798  | 0.39                 | (0.37–0.41) | <.001 |
| Hospital                           | 0.76                | (0.58–0.98) | 0.037 | 2.53               | (1.20–5.33)  | 0.015  | 0.55                 | (0.51–0.60) | <.001 |
| Individual                         | -                   | -           | -     | -                  | -            | -      | -                    | -           | -     |
| Other facility                     | 2.02                | (1.49–2.74) | <.001 | 1.68               | (0.79–3.56)  | 0.176  | 0.64                 | (0.57–0.73) | <.001 |
| Unknown                            | 1.90                | (1.49–2.43) | <.001 | 3.69               | (2.14–6.36)  | <.001  | 0.52                 | (0.49–0.55) | <.001 |
| <b>Insurance</b>                   |                     |             |       |                    |              |        |                      |             |       |
| Commercial insurance               | -                   | -           | -     | -                  | -            | -      | -                    | -           | -     |
| Medicare Advantage                 | 0.31                | (0.28–0.35) | <.001 | 0.38               | (0.29–0.50)  | <.001  | 0.04                 | (0.03–0.04) | <.001 |
| Unknown                            | 0.52                | (0.04–6.42) | 0.611 | 0                  | (0–Inf.)     | >0.999 | 0.24                 | (0.14–0.42) | <.001 |

OR = odds ratio; CI = confidence interval; DM = diabetes mellitus; NE = not estimated; Inf = infinity

<sup>a</sup>DM without eye disease: ICD-9 (250.x0, 250.x1, 250.x2, 250.x3) and ICD-10 (E10, E11). Diabetic eye disease: ICD-9 (362.0–362.07, 250.5x) and ICD-10 (E08.3xxx–E13.3xxx). Other eye disease (excluding diabetic eye disease codes above): ICD-9 (190.x, 224.x, 234.x, 249.5x, 250.5x, 360.xx–379.xx, 743.xx, 918.x, 930.x, E914, V41.1, V42.5, V45.6x, V45.78, V80.1, V80.2) and ICD-10 (C69.xx, D09.2x, D31.xx, E08.3xxx–E13.3xxx, H00.xxx–H59.xxx, Q14.x, Q15.x, S05.x, T15.x, T26.x, Z90.01, Z94.7, Z96.1, Z85.840, Z87.720, Z98.4x, Z98.85).
